# Supplementary material
Source: Springer Nature journal article supplement (https://www.springermedizin.de/resource/supplementary/12931_2010_1036_MOESM1_ESM.pdf/9425374)

A. Blood, negative control

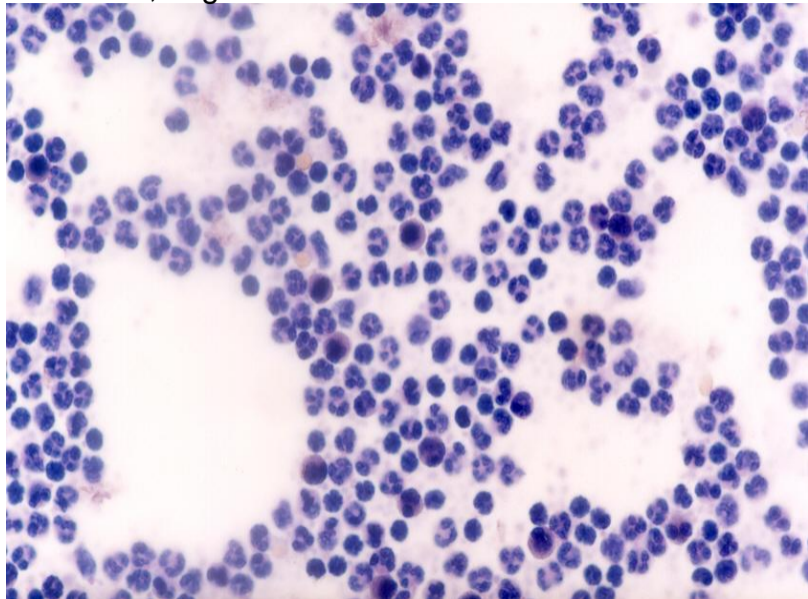

B. Blood positive, ECP

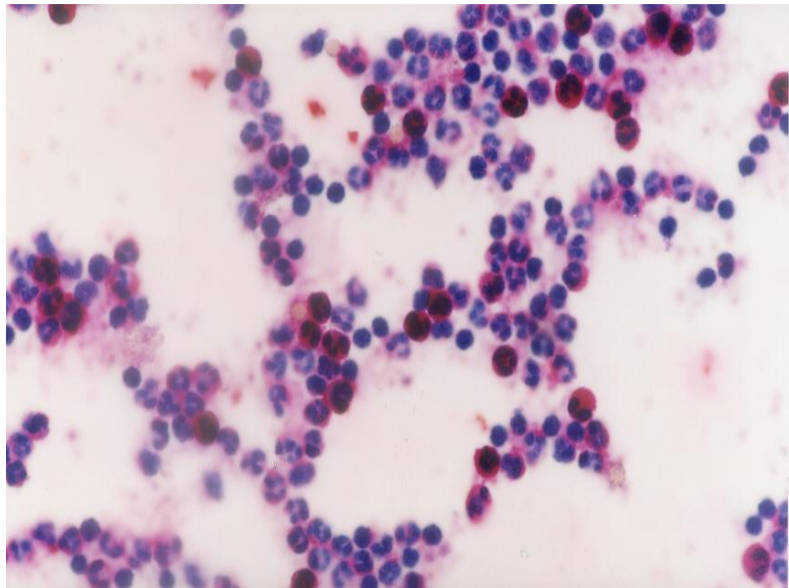

Supplement: MOESM1 [file 9425374]
